# Supplementary material for: An Emerging Cross-Species Marker for Organismal Health: Tryptophan-Kynurenine Pathway
Source: MDPI journal article supplement (doi:10.3390/ijms23116300), 2022-06-04
Supplement: s1 [file s1]

**Table S1.** Clinical Implication of Kynurenine Metabolites.

| Organ            | Clinical Implication        | Disease Phenotype          | Reference(s)           |
|------------------|-----------------------------|----------------------------|------------------------|
| Brain            | Cancer                      | Cancer                     | [1]                    |
|                  | Neurobehaviour              | Addiction                  | [2]                    |
|                  |                             | Bipolar                    | [3], [4],[5], [6]      |
|                  |                             | Depression                 | [5], [7], [8], [9]     |
|                  |                             | Schizophrenia              | [6], [5], [10]         |
|                  |                             | ALS/MS                     | [11], [12]             |
|                  | Neurodegenerative           | Alzheimer's Disease        | [13], [14]             |
|                  |                             | Dementia                   | [15]                   |
|                  |                             | Parkinson's Disease        | [16], [17]             |
|                  |                             | REVIEW                     | [18], [19]             |
|                  |                             | CNS and PNS disorders      | [20]                   |
|                  | Neurological Illness        | Migraine                   | [21], [22]             |
|                  |                             | Neurotransmission          | [23]                   |
|                  |                             | REVIEW                     | [24]                   |
|                  |                             | Somatic Symptoms           | [25]                   |
|                  | Neuropathic Pain            | Neuropathic Pain           | [26], [27], [28]       |
| Breast           | Cancer                      | Cancer                     | [29]                   |
| Heart            | Cardiometabolic             | Cardiometabolic            | [30]                   |
|                  |                             | Cardiovascular Disease     | [31],[32], [33], [34]  |
| Endocrine        | Metabolism                  | Obesity                    | [35], [36]             |
|                  |                             | Gastrointestinal Disorders | [37]                   |
| Gastrointestinal | Gastrointestinal Regulation | Gut Homeostasis            | [38], [39]             |
|                  |                             | Inflammatory Bowel Disease | [40]                   |
|                  |                             | Endocrinopathies           | [41]                   |
| Immune System    | Immunity                    | Inflammation               | [42], [43]             |
|                  |                             | SARS-CoV-2                 | [44], [45]             |
|                  |                             |                            |                        |
| Kidney           | Kidney Disease              |                            | [46], [47]             |
|                  |                             |                            |                        |
| Liver            | Cancer                      | Cancer                     | [48], [49]             |
|                  | Metabolism                  | Energy Homeostasis         | [50], [51]             |
|                  |                             | Inflammation               | [52]                   |
|                  |                             | Liver Cirrhosis            | [53]                   |
|                  |                             | Liver Fibrosis             | [54]                   |
|                  |                             | Inflammation               | [55]                   |
| MuscoSkeletal    | MuscoSkeletal               | SARS-CoV-2                 | [56]                   |
|                  |                             |                            |                        |
| Placenta         | Reproduction                | Pregnancy                  | [57], [58], [59], [60] |
|                  | Reproductive Disorders      | Preeclampsia               | [61], [62]             |
| REVIEW           | Cancer                      |                            | [63]                   |
|                  | Gerontology                 |                            | [64]                   |
|                  | All disease phenotypes      |                            | [65], [66], [67]       |

## References

1. Sordillo, P.P.; Sordillo, L.A.; Helson, L. The Kynurenine Pathway: A Primary Resistance Mechanism in Patients with Glioblastoma. *Anticancer Res.* **2017**, *37*, 2159–2171. <https://doi.org/10.21873/anticancer.11551>.
2. Morales-Puerto, N.; Giménez-Gómez, P.; Pérez-Hernández, M.; Abuin-Martínez, C.; Gil de Biedma-Elduayen, L.; Vidal, R.; Gutiérrez-López, M.D.; O'Shea, E.; Colado, M.I. Addiction and the Kynurenine

- Pathway: A New Dancing Couple? *Pharmacol. Ther.* **2021**, *223*, 107807. <https://doi.org/10.1016/j.pharmthera.2021.107807>.
3. Zhang, P.; Huang, H.; Gao, X.; Jiang, J.; Xi, C.; Wu, L.; Fu, Y.; Lai, J.; Hu, S. Involvement of Kynurenine Metabolism in Bipolar Disorder: An Updated Review. *Front. Psychiatry* **2021**, *12*, 677039. <https://doi.org/10.3389/fpsyt.2021.677039>.
  4. Bartoli, F.; Misiak, B.; Callovini, T.; Cavaleri, D.; Cioni, R.M.; Crocamo, C.; Savitz, J.B.; Carrà, G. The Kynurenine Pathway in Bipolar Disorder: A Meta-Analysis on the Peripheral Blood Levels of Tryptophan and Related Metabolites. *Mol. Psychiatry* **2021**, *26*, 3419–3429. <https://doi.org/10.1038/s41380-020-00913-1>.
  5. Marx, W.; McGuinness, A.J.; Rocks, T.; Ruusunen, A.; Cleminson, J.; Walker, A.J.; Gomes-da-Costa, S.; Lane, M.; Sanches, M.; Diaz, A.P.; et al. The Kynurenine Pathway in Major Depressive Disorder, Bipolar Disorder, and Schizophrenia: A Meta-Analysis of 101 Studies. *Mol. Psychiatry* **2021**, *26*, 4158–4178. <https://doi.org/10.1038/s41380-020-00951-9>.
  6. Erhardt, S.; Schwieler, L.; Imbeault, S.; Engberg, G. The Kynurenine Pathway in Schizophrenia and Bipolar Disorder. *Neuropharmacology* **2017**, *112*, 297–306. <https://doi.org/10.1016/j.neuropharm.2016.05.020>.
  7. Hunt, C.; Macedo, E. Cordeiro, T.; Suchting, R.; de Dios, C.; Cuellar Leal, V.A.; Soares, J.C.; Dantzer, R.; Teixeira, A.L.; Selvaraj, S. Effect of Immune Activation on the Kynurenine Pathway and Depression Symptoms—A Systematic Review and Meta-Analysis. *Neurosci. Biobehav. Rev.* **2020**, *118*, 514–523. <https://doi.org/10.1016/j.neubiorev.2020.08.010>.
  8. Brown, S.J.; Huang, X.-F.; Newell, K.A. The Kynurenine Pathway in Major Depression: What We Know and Where to Next. *Neurosci. Biobehav. Rev.* **2021**, *127*, 917–927. <https://doi.org/10.1016/j.neubiorev.2021.05.018>.
  9. Serafini, G.; Adavastro, G.; Canepa, G.; Capobianco, L.; Conigliaro, C.; Pittaluga, F.; Murri, M.B.; Valchera, A.; De Berardis, D.; Pompili, M.; et al. Abnormalities in Kynurenine Pathway Metabolism in Treatment-Resistant Depression and Suicidality: A Systematic Review. *CNS Neurol. Disord. Drug Targets* **2017**, *16*, 440–453. <https://doi.org/10.2174/1871527316666170413110605>.
  10. Cao, B.; Chen, Y.; Ren, Z.; Pan, Z.; McIntyre, R.S.; Wang, D. Dysregulation of Kynurenine Pathway and Potential Dynamic Changes of Kynurenine in Schizophrenia: A Systematic Review and Meta-Analysis. *Neurosci. Biobehav. Rev.* **2021**, *123*, 203–214. <https://doi.org/10.1016/j.neubiorev.2021.01.018>.
  11. Tan, V.X.; Guillemin, G.J. Kynurenine Pathway Metabolites as Biomarkers for Amyotrophic Lateral Sclerosis. *Front. Neurosci.* **2019**, *13*, 1013. <https://doi.org/10.3389/fnins.2019.01013>.
  12. Pukoli, D.; Polyák, H.; Rajda, C.; Vécsei, L. Kynurenines and Neurofilament Light Chain in Multiple Sclerosis. *Front. Neurosci.* **2021**, *15*, 658202. <https://doi.org/10.3389/fnins.2021.658202>.
  13. Sharma, V.K.; Singh, T.G.; Prabhakar, N.K.; Mannan, A. Kynurenine Metabolism and Alzheimer's Disease: The Potential Targets and Approaches. *Neurochem. Res.* **2022**, *47*, 1459–1476. <https://doi.org/10.1007/s11064-022-03546-8>.
  14. Liang, Y.; Xie, S.; He, Y.; Xu, M.; Qiao, X.; Zhu, Y.; Wu, W. Kynurenine Pathway Metabolites as Biomarkers in Alzheimer's Disease. *Dis. Markers* **2022**, *2022*, e9484217. <https://doi.org/10.1155/2022/9484217>.
  15. Tanaka, M.; Bohár, Z.; Vécsei, L. Are Kynurenines Accomplices or Principal Villains in Dementia? Maintenance of Kynurenine Metabolism. *Molecules* **2020**, *25*, 564. <https://doi.org/10.3390/molecules25030564>.

16. Venkatesan, D.; Iyer, M.; Narayanasamy, A.; Siva, K.; Vellingiri, B. Kynurenine Pathway in Parkinson's Disease-an Update. *Eneurologicalsci* **2020**, *21*, 100270. <https://doi.org/10.1016/j.ensci.2020.100270>.
17. Behl, T.; Kaur, I.; Sehgal, A.; Singh, S.; Bhatia, S.; Al-Harrasi, A.; Zengin, G.; Bumbu, A.G.; Andronie-Cioara, F.L.; Nechifor, A.C.; et al. The Footprint of Kynurenine Pathway in Neurodegeneration: Janus-Faced Role in Parkinson's Disorder and Therapeutic Implications. *Int. J. Mol. Sci.* **2021**, *22*, 6737. <https://doi.org/10.3390/ijms22136737>.
18. Mor, A.; Tankiewicz-Kwedlo, A.; Krupa, A.; Pawlak, D. Role of Kynurenine Pathway in Oxidative Stress during Neurodegenerative Disorders. *Cells* **2021**, *10*, 1603. <https://doi.org/10.3390/cells10071603>.
19. Török, N.; Tanaka, M.; Vécsei, L. Searching for Peripheral Biomarkers in Neurodegenerative Diseases: The Tryptophan-Kynurenine Metabolic Pathway. *Int. J. Mol. Sci.* **2020**, *21*, 9338. <https://doi.org/10.3390/ijms21249338>.
20. Huang, Y.-S.; Ogbechi, J.; Clanchy, F.I.; Williams, R.O.; Stone, T.W. IDO and Kynurenine Metabolites in Peripheral and CNS Disorders. *Front. Immunol.* **2020**, *11*, 388. <https://doi.org/10.3389/fimmu.2020.00388>.
21. Curto, M.; Lionetto, L.; Fazio, F.; Mitsikostas, D.-D.; Martelletti, P. Fathoming the Kynurenine Pathway in Migraine: Why Understanding the Enzymatic Cascades Is Still Critically Important. *Intern. Emerg. Med.* **2015**, *10*, 413–421. <https://doi.org/10.1007/s11739-015-1208-6>.
22. Fila, M.; Chojnacki, J.; Pawlowska, E.; Szczepanska, J.; Chojnacki, C.; Blasiak, J. Kynurenine Pathway of Tryptophan Metabolism in Migraine and Functional Gastrointestinal Disorders. *Int. J. Mol. Sci.* **2021**, *22*, 10134. <https://doi.org/10.3390/ijms221810134>.
23. Martos, D.; Tuka, B.; Tanaka, M.; Vécsei, L.; Telegdy, G. Memory Enhancement with Kynurenic Acid and Its Mechanisms in Neurotransmission. *Biomedicines* **2022**, *10*, 849. <https://doi.org/10.3390/biomedicines10040849>.
24. Tanaka, M.; Vécsei, L. Monitoring the Kynurenine System: Concentrations, Ratios or What Else? *Adv. Clin. Exp. Med.* **2021**, *30*, 775–778. <https://doi.org/10.17219/acem/139572>.
25. Dogrul, B.N. Indolamine 2,3-Dioxygenase (IDO) Inhibitors as a Potential Treatment for Somatic Symptoms. *Med. Hypotheses* **2022**, *160*, 110777. <https://doi.org/10.1016/j.mehy.2022.110777>.
26. Tanaka, M.; Török, N.; Tóth, F.; Szabó, Á.; Vécsei, L. Co-Players in Chronic Pain: Neuroinflammation and the Tryptophan-Kynurenine Metabolic Pathway. *Biomedicines* **2021**, *9*, 897. <https://doi.org/10.3390/biomedicines9080897>.
27. Ciapała, K.; Mika, J.; Rojewska, E. The Kynurenine Pathway as a Potential Target for Neuropathic Pain Therapy Design: From Basic Research to Clinical Perspectives. *Int. J. Mol. Sci.* **2021**, *22*, 11055. <https://doi.org/10.3390/ijms222011055>.
28. Jovanovic, F.; Candido, K.D.; Knezevic, N.N. The Role of the Kynurenine Signaling Pathway in Different Chronic Pain Conditions and Potential Use of Therapeutic Agents. *Int. J. Mol. Sci.* **2020**, *21*, 6045. <https://doi.org/10.3390/ijms21176045>.
29. Heng, B.; Lim, C.K.; Lovejoy, D.B.; Bessede, A.; Gluch, L.; Guillemin, G.J. Understanding the Role of the Kynurenine Pathway in Human Breast Cancer Immunobiology. *Oncotarget* **2016**, *7*, 6506–6520. <https://doi.org/10.18632/oncotarget.6467>.
30. Kiluk, M.; Lewkowicz, J.; Pawlak, D.; Tankiewicz-Kwedlo, A. Crosstalk between Tryptophan Metabolism via Kynurenine Pathway and Carbohydrate Metabolism in the Context of Cardio-Metabolic Risk-Review. *J. Clin. Med.* **2021**, *10*, 2484. <https://doi.org/10.3390/jcm10112484>.

31. Song, P.; Ramprasath, T.; Wang, H.; Zou, M.-H. Abnormal Kynurenine Pathway of Tryptophan Catabolism in Cardiovascular Diseases. *Cell. Mol. Life Sci.* **2017**, *74*, 2899–2916. <https://doi.org/10.1007/s00018-017-2504-2>.
32. Gáspár, R.; Halmi, D.; Demján, V.; Berkecz, R.; Pipicz, M.; Csont, T. Kynurenine Pathway Metabolites as Potential Clinical Biomarkers in Coronary Artery Disease. *Front. Immunol.* **2021**, *12*, 768560. <https://doi.org/10.3389/fimmu.2021.768560>.
33. Razquin, C.; Ruiz-Canela, M.; Toledo, E.; Hernández-Alonso, P.; Clish, C.B.; Guasch-Ferré, M.; Li, J.; Wittenbecher, C.; Dennis, C.; Alonso-Gómez, A.; et al. Metabolomics of the Tryptophan-Kynurenine Degradation Pathway and Risk of Atrial Fibrillation and Heart Failure: Potential Modification Effect of Mediterranean Diet. *Am. J. Clin. Nutr.* **2021**, *114*, 1646–1654. <https://doi.org/10.1093/ajcn/nqab238>.
34. Melhem, N.J.; Taleb, S. Tryptophan: From Diet to Cardiovascular Diseases. *Int. J. Mol. Sci.* **2021**, *22*, 9904. <https://doi.org/10.3390/ijms22189904>.
35. Engin, A.B.; Engin, A. The Interactions Between Kynurenine, Folate, Methionine and Pteridine Pathways in Obesity. In *Obesity and Lipotoxicity*; Engin, A.B., Engin, A., Eds.; Advances in Experimental Medicine and Biology; Springer International Publishing: Cham, Switzerland, 2017; pp. 511–527, ISBN 978-3-319-48382-5.
36. Dadvar, S.; Ferreira, D.M.S.; Cervenka, I.; Ruas, J.L. The Weight of Nutrients: Kynurenine Metabolites in Obesity and Exercise. *J. Intern. Med.* **2018**, *284*, 519–533. <https://doi.org/10.1111/joim.12830>.
37. Agus, A.; Planchais, J.; Sokol, H. Gut Microbiota Regulation of Tryptophan Metabolism in Health and Disease. *Cell Host Microbe* **2018**, *23*, 716–724. <https://doi.org/10.1016/j.chom.2018.05.003>.
38. Kennedy, P.J.; Cryan, J.F.; Dinan, T.G.; Clarke, G. Kynurenine Pathway Metabolism and the Microbiota-Gut-Brain Axis. *Neuropharmacology* **2017**, *112*, 399–412. <https://doi.org/10.1016/j.neuropharm.2016.07.002>.
39. Sun, M.; Ma, N.; He, T.; Johnston, L.J.; Ma, X. Tryptophan (Trp) Modulates Gut Homeostasis via Aryl Hydrocarbon Receptor (AhR). *Crit. Rev. Food Sci. Nutr.* **2020**, *60*, 1760–1768. <https://doi.org/10.1080/10408398.2019.1598334>.
40. Chen, L.-M.; Bao, C.-H.; Wu, Y.; Liang, S.-H.; Wang, D.; Wu, L.-Y.; Huang, Y.; Liu, H.-R.; Wu, H.-G. Tryptophan-Kynurenine Metabolism: A Link between the Gut and Brain for Depression in Inflammatory Bowel Disease. *J. Neuroinflamm.* **2021**, *18*, 135. <https://doi.org/10.1186/s12974-021-02175-2>.
41. Krupa, A.; Kowalska, I. The Kynurenine Pathway-New Linkage between Innate and Adaptive Immunity in Autoimmune Endocrinopathies. *Int. J. Mol. Sci.* **2021**, *22*, 9879. <https://doi.org/10.3390/ijms22189879>.
42. Haq, S.; Grondin, J.A.; Khan, W.I. Tryptophan-Derived Serotonin-Kynurenine Balance in Immune Activation and Intestinal Inflammation. *FASEB J.* **2021**, *35*, e21888. <https://doi.org/10.1096/fj.202100702R>.
43. Moffett, J.R.; Arun, P.; Puthillathu, N.; Vengilote, R.; Ives, J.A.; Badawy, A.A.-B.; Namboodiri, A.M. Quinolate as a Marker for Kynurenine Metabolite Formation and the Unresolved Question of NAD<sup>+</sup> Synthesis During Inflammation and Infection. *Front. Immunol.* **2020**, *11*, 31. <https://doi.org/10.3389/fimmu.2020.00031>.
44. Collier, M.E.; Zhang, S.; Scrutton, N.S.; Giorgini, F. Inflammation Control and Improvement of Cognitive Function in COVID-19 Infections: Is There a Role for Kynurenine 3-Monooxygenase Inhibition? *Drug Discov. Today* **2021**, *26*, 1473–1481. <https://doi.org/10.1016/j.drudis.2021.02.009>.
45. Lawler, N.G.; Gray, N.; Kimhofer, T.; Boughton, B.; Gay, M.; Yang, R.; Morillon, A.-C.; Chin, S.-T.; Ryan, M.; Begum, S.; et al. Systemic Perturbations in Amine and Kynurenine Metabolism Associated with

- Acute SARS-CoV-2 Infection and Inflammatory Cytokine Responses. *J. Proteome Res.* **2021**, *20*, 2796–2811. <https://doi.org/10.1021/acs.jproteome.1c00052>.
46. Wee, H.N.; Liu, J.-J.; Ching, J.; Kovalik, J.-P.; Lim, S.C. The Kynurenine Pathway in Acute Kidney Injury and Chronic Kidney Disease. *Am. J. Nephrol.* **2021**, *52*, 771–787. <https://doi.org/10.1159/000519811>.
  47. Mor, A.; Kalaska, B.; Pawlak, D. Kynurenine Pathway in Chronic Kidney Disease: What's Old, What's New, and What's Next? *Int. J. Tryptophan Res. IJTR* **2020**, *13*, 1178646920954882. <https://doi.org/10.1177/1178646920954882>.
  48. Krishnamurthy, S.; Gilot, D.; Ahn, S.B.; Lam, V.; Shin, J.-S.; Guillemin, G.J.; Heng, B. Involvement of Kynurenine Pathway in Hepatocellular Carcinoma. *Cancers* **2021**, *13*, 5180. <https://doi.org/10.3390/cancers13205180>.
  49. Miyazaki, T.; Chung, S.; Sakai, H.; Ohata, H.; Obata, Y.; Shiokawa, D.; Mizoguchi, Y.; Kubo, T.; Ichikawa, H.; Taniguchi, H.; et al. Stemness and Immune Evasion Conferred by the TDO2-AHR Pathway Are Associated with Liver Metastasis of Colon Cancer. *Cancer Sci.* **2022**, *113*, 170–181. <https://doi.org/10.1111/cas.15182>.
  50. Martin, K.S.; Azzolini, M.; Lira Ruas, J. The Kynurenine Connection: How Exercise Shifts Muscle Tryptophan Metabolism and Affects Energy Homeostasis, the Immune System, and the Brain. *Am. J. Physiol. Cell Physiol.* **2020**, *318*, C818–C830. <https://doi.org/10.1152/ajpcell.00580.2019>.
  51. Sui, G.; Jia, L.; Quan, D.; Zhao, N.; Yang, G. Activation of the Gut Microbiota-Kynurenine-Liver Axis Contributes to the Development of Nonalcoholic Hepatic Steatosis in Nondiabetic Adults. *Aging* **2021**, *13*, 21309–21324. <https://doi.org/10.18632/aging.203460>.
  52. Dhillon, A.K.; Rupp, C.; Bergquist, A.; Voith, R.; Folseraas, T.; Trøseid, M.; Midttun, Ø.; Ueland, P.M.; Karlsen, T.H.; Vesterhus, M.; et al. Associations of Neopterin and Kynurenine–Tryptophan Ratio with Survival in Primary Sclerosing Cholangitis. *Scand. J. Gastroenterol.* **2021**, *56*, 443–452. <https://doi.org/10.1080/00365521.2021.1880627>.
  53. Clària, J.; Moreau, R.; Fenaille, F.; Amorós, A.; Junot, C.; Gronbaek, H.; Coenraad, M.J.; Pruvost, A.; Ghetta, A.; Chu-Van, E.; et al. Orchestration of Tryptophan-Kynurenine Pathway, Acute Decompensation, and Acute-on-Chronic Liver Failure in Cirrhosis. *Hepatology* **2019**, *69*, 1686–1701. <https://doi.org/10.1002/hep.30363>.
  54. Kardashian, A.; Ma, Y.; Yin, M.T.; Scherzer, R.; Nolan, O.; Aweeka, F.; Tien, P.C.; Price, J.C. High Kynurenine:Tryptophan Ratio Is Associated With Liver Fibrosis in HIV-Monoinfected and HIV/Hepatitis C Virus–Coinfected Women. *Open Forum Infect. Dis.* **2019**, *6*, ofz281. <https://doi.org/10.1093/ofid/ofz281>.
  55. Ogbechi, J.; Clanchy, F.I.; Huang, Y.-S.; Topping, L.M.; Stone, T.W.; Williams, R.O. IDO Activation, Inflammation and Musculoskeletal Disease. *Exp. Gerontol.* **2020**, *131*, 110820. <https://doi.org/10.1016/j.exger.2019.110820>.
  56. Vyavahare, S.; Kumar, S.; Cantu, N.; Kolhe, R.; Bollag, W.B.; McGee-Lawrence, M.E.; Hill, W.D.; Hamrick, M.W.; Isales, C.M.; Fulzele, S. Tryptophan-Kynurenine Pathway in COVID-19-Dependent Musculoskeletal Pathology: A Minireview. *Mediators Inflamm.* **2021**, *2021*, 2911578. <https://doi.org/10.1155/2021/2911578>.
  57. Broekhuizen, M.; Danser, A.H.J.; Reiss, I.K.M.; Merkus, D. The Function of the Kynurenine Pathway in the Placenta: A Novel Pharmacotherapeutic Target? *Int. J. Environ. Res. Public Health* **2021**, *18*, 11545. <https://doi.org/10.3390/ijerph182111545>.

58. Silvano, A.; Seravalli, V.; Strambi, N.; Cecchi, M.; Tartarotti, E.; Parenti, A.; Di Tommaso, M. Tryptophan Metabolism and Immune Regulation in the Human Placenta. *J. Reprod. Immunol.* **2021**, *147*, 103361. <https://doi.org/10.1016/j.jri.2021.103361>.
59. Badawy, A.A.-B. Tryptophan Metabolism, Disposition and Utilization in Pregnancy. *Biosci. Rep.* **2015**, *35*, e00261. <https://doi.org/10.1042/BSR20150197>.
60. Xu, K.; Liu, G.; Fu, C. The Tryptophan Pathway Targeting Antioxidant Capacity in the Placenta. *Oxid. Med. Cell. Longev.* **2018**, *2018*, 1054797. <https://doi.org/10.1155/2018/1054797>.
61. Worton, S.A.; Greenwood, S.L.; Wareing, M.; Heazell, A.E.; Myers, J. The Kynurenine Pathway; A New Target for Treating Maternal Features of Preeclampsia? *Placenta* **2019**, *84*, 44–49. <https://doi.org/10.1016/j.placenta.2019.04.007>.
62. Gumusoglu, S.; Scroggins, S.; Vignato, J.; Santillan, D.; Santillan, M. The Serotonin-Immune Axis in Preeclampsia. *Curr. Hypertens. Rep.* **2021**, *23*, 37. <https://doi.org/10.1007/s11906-021-01155-4>.
63. Ala, M. The Footprint of Kynurenine Pathway in Every Cancer: A New Target for Chemotherapy. *Eur. J. Pharmacol.* **2021**, *896*, 173921. <https://doi.org/10.1016/j.ejphar.2021.173921>.
64. Castro-Portuguez, R.; Sutphin, G.L. Kynurenine Pathway, NAD<sup>+</sup> Synthesis, and Mitochondrial Function: Targeting Tryptophan Metabolism to Promote Longevity and Healthspan. *Exp. Gerontol.* **2020**, *132*, 110841. <https://doi.org/10.1016/j.exger.2020.110841>.
65. Savitz, J. The Kynurenine Pathway: A Finger in Every Pie. *Mol. Psychiatry* **2020**, *25*, 131–147. <https://doi.org/10.1038/s41380-019-0414-4>.
66. Badawy, A.A.-B. Kynurenine Pathway and Human Systems. *Exp. Gerontol.* **2020**, *129*, 110770. <https://doi.org/10.1016/j.exger.2019.110770>.
67. Lu, Y.; Shao, M.; Wu, T. Kynurenine-3-Monooxygenase: A New Direction for the Treatment in Different Diseases. *Food Sci. Nutr.* **2020**, *8*, 711–719. <https://doi.org/10.1002/fsn3.1418>.
